# Supplementary material
Source: PubMed Central journal article supplement (PMC6433073)
Supplement: supp_RA118.006193_141228_2_supp_269330_plfn44.pdf [file supp_RA118.006193_141228_2_supp_269330_plfn44.pdf]

## Supporting Information

Molecular mechanisms of heparin-induced modulation of human interleukin 12 bioactivity

**Khue G. Nguyen<sup>1,2</sup>, Francis B. Gillam<sup>2</sup>, Jared J. Hopkins<sup>2</sup>, Srinivas Jayanthi<sup>3</sup>, Ravi Kumar Gundampati<sup>3</sup>, Guowei Su<sup>4</sup>, Jenifer Bear<sup>5</sup>, Guy R. Pilkington<sup>5</sup>§, Rashmi Jalah<sup>5</sup>#, Barbara K. Felber<sup>5</sup>, Jian Liu<sup>4</sup>, Thallapuranam Krishnaswamy Suresh Kumar<sup>3</sup>, David A. Zaharoff<sup>1,2</sup>\***

From the <sup>1</sup> Department of Microbiology and Immunology, University of North Carolina, Chapel Hill, NC; <sup>2</sup> Joint Department of Biomedical Engineering, North Carolina State University and the University of North Carolina-Chapel Hill, Raleigh, NC; <sup>3</sup> Department of Chemistry & Biochemistry, University of Arkansas, Fayetteville, AR; <sup>4</sup> Division of Chemical Biology and Chemistry, Eshelman School of Pharmacy, University of North Carolina, Chapel Hill, NC; <sup>5</sup> Human Retrovirus Pathogenesis Section, Vaccine Branch-National Cancer Institute, Frederick, MD

Running title: *Mechanisms of heparin-induced IL-12 modulation*

§ Present address: G.R.P, ImQuest BioSciences, Frederick, MD 21704

# Present address: R.J., GlaxoSmithKline (GSK) Vaccines, Rockville, MD 20850

\* To whom correspondence should be addressed: David A. Zaharoff: Joint Department of Biomedical Engineering, North Carolina State University and the University of North Carolina-Chapel Hill, Raleigh, NC, 27695; [dazaharo@ncsu.edu](mailto:dazaharo@ncsu.edu); Phone: (919) 515-6757.

**Keywords:** interleukin-12, heparin, heparan sulfate, heparin-binding protein, glycosaminoglycan, IL-12 bioactivity, IL-12 complex

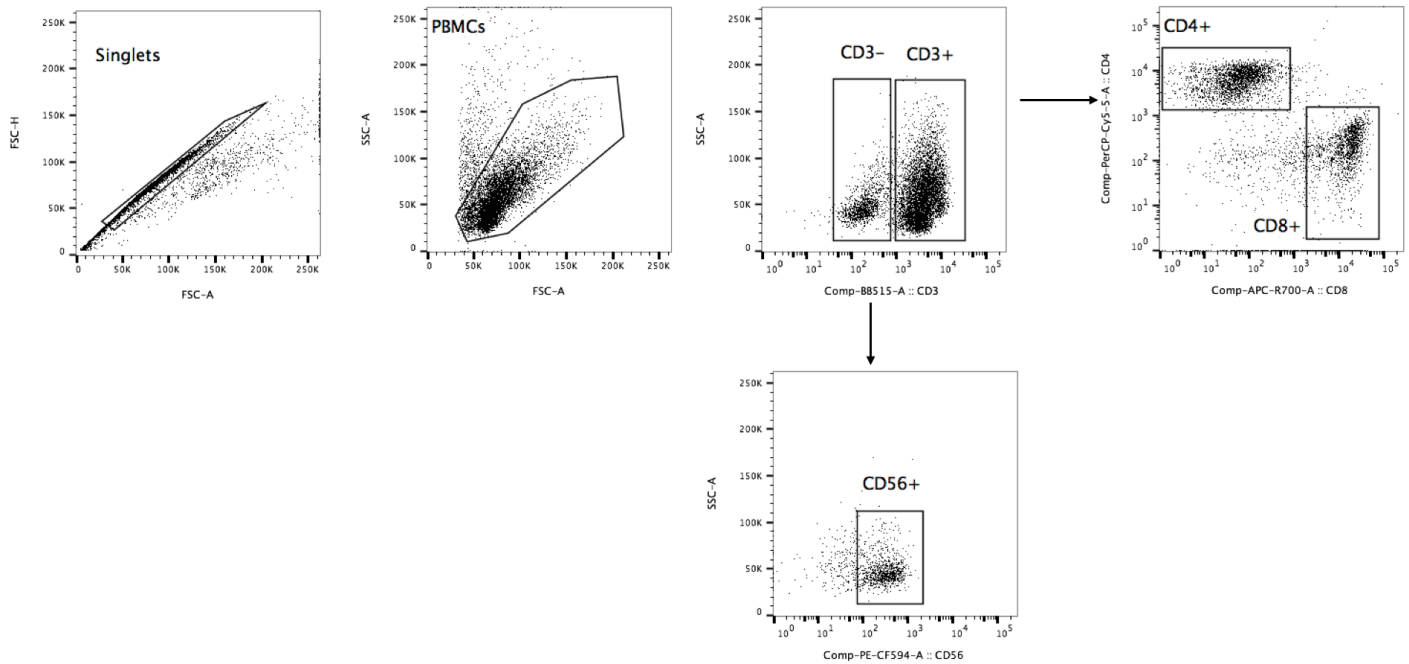

**Supplemental Figure S1. Gating strategies of CD4 T cells, CD8 T cells, CD56 NK cells from PBMCs.**

Lymphocytes for analysis of CD4 T cells, CD8 T cells, and NK cells were gated based on using forward scatter (FSC)/side scatter (SSC) dot plots. Single cells were gated based on FSC-H and FSC-A dot plots. T cells were gated from lymphocytes based on dot plots SSC/CD3. From the T cell (CD3+) gate, Th (CD4+) and Tc (CD8+) cells were gated based on CD8/CD4 dot plots. From the non-T cell (CD3-) gate, NK cells (CD3-/CD56+) were gated based on SSC/CD56 dot plots.

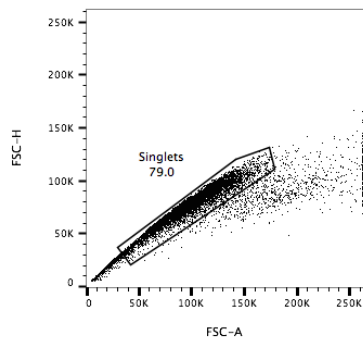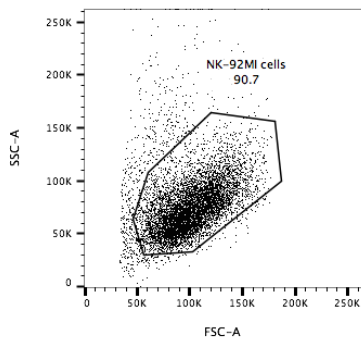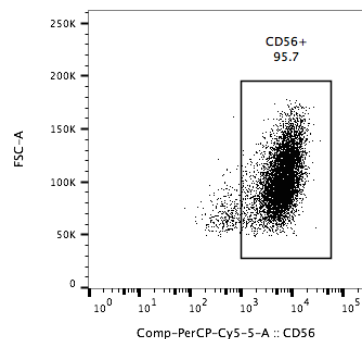

**Supplemental Figure S2. Gating strategies of NK-92MI cells.** Single cells were gated based on FSC-H and FSC-A dot plots. NK-92MI cells were gated based on using FSC-A/SSC-A and FSC-A/CD56 dot plots.

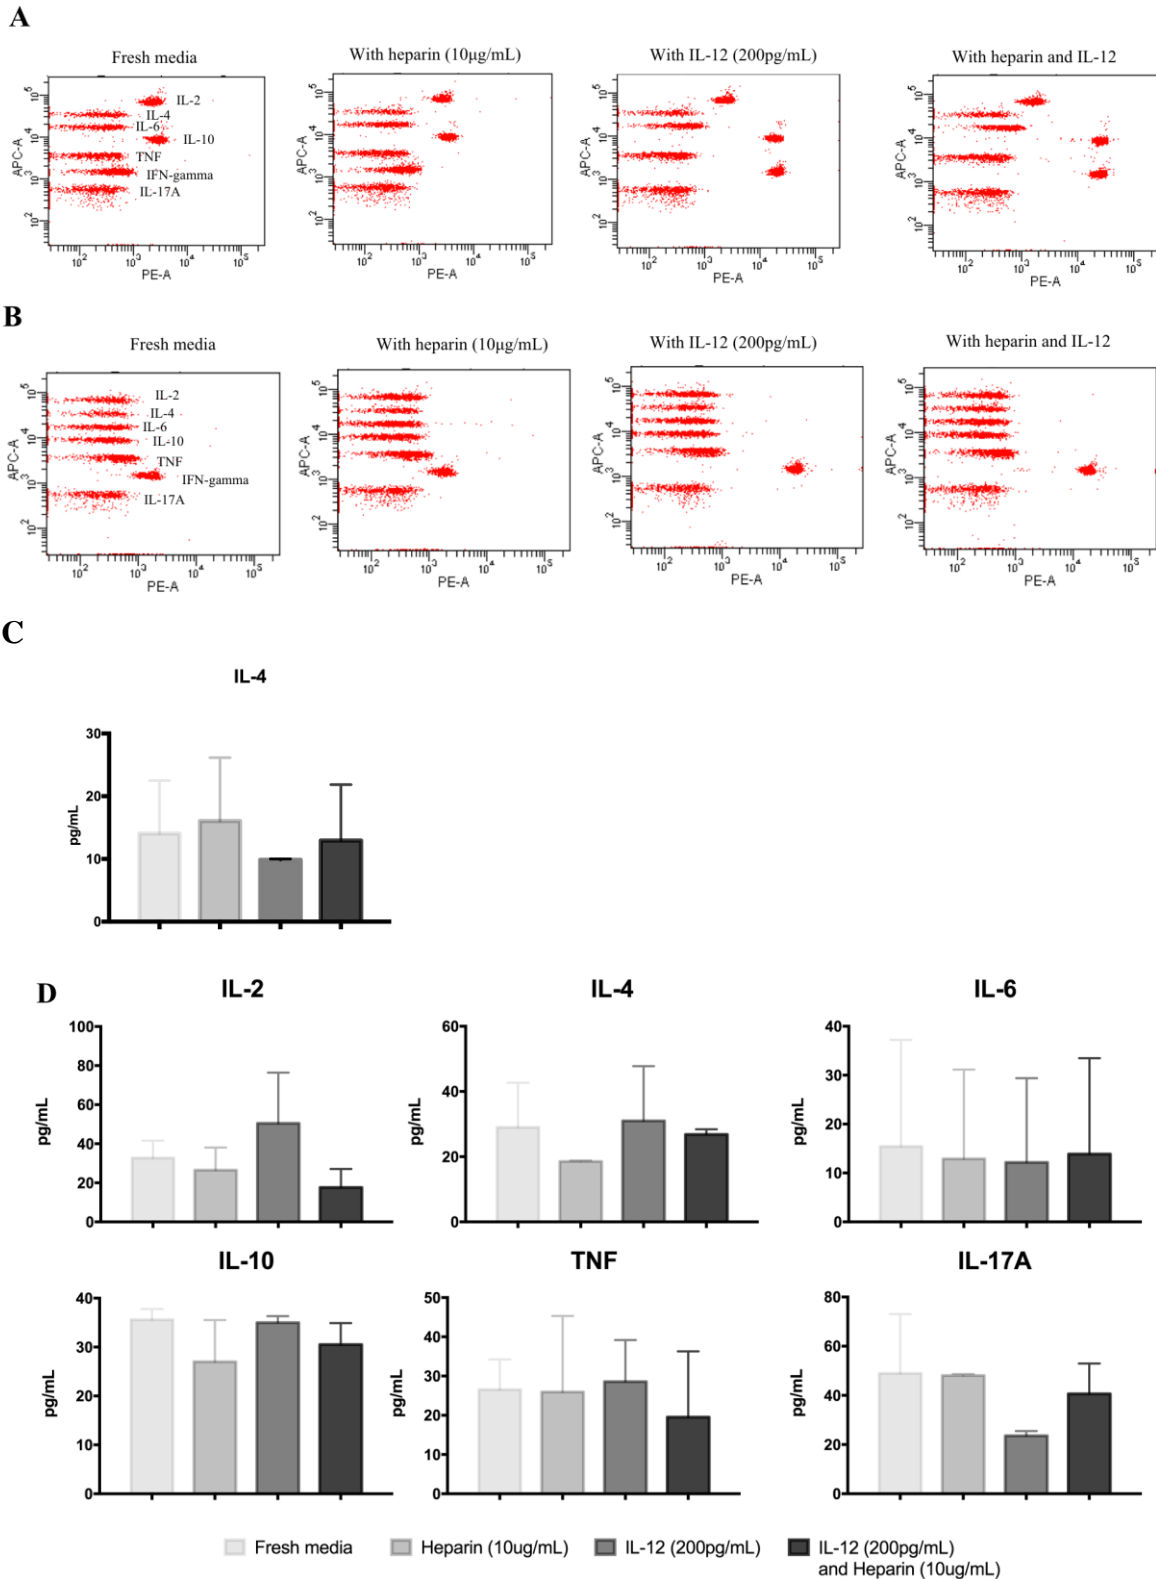

**Supplemental Figure S3. Cytokine profiles produced by NK-92MI cells and CD3 T cells in response with induction from fresh media, with heparin alone, with IL-12 alone, or with both reagents.** Cytometric bead array (CBA) dot plots showing the productions of 7 cytokines including IL-2, IL-4, IL-6, IL-10, TNF, IFN $\gamma$ , and IL-17A from (A) NK-92MI cells, (B) Human CD3 T cells. Bar graph showing the production of cytokines including IL-4 from (C) NK-92MI cells, and the production of IL-2, IL-4, IL-6, IL-10, TNF and IL-17A from (D) Human CD3 T cells.

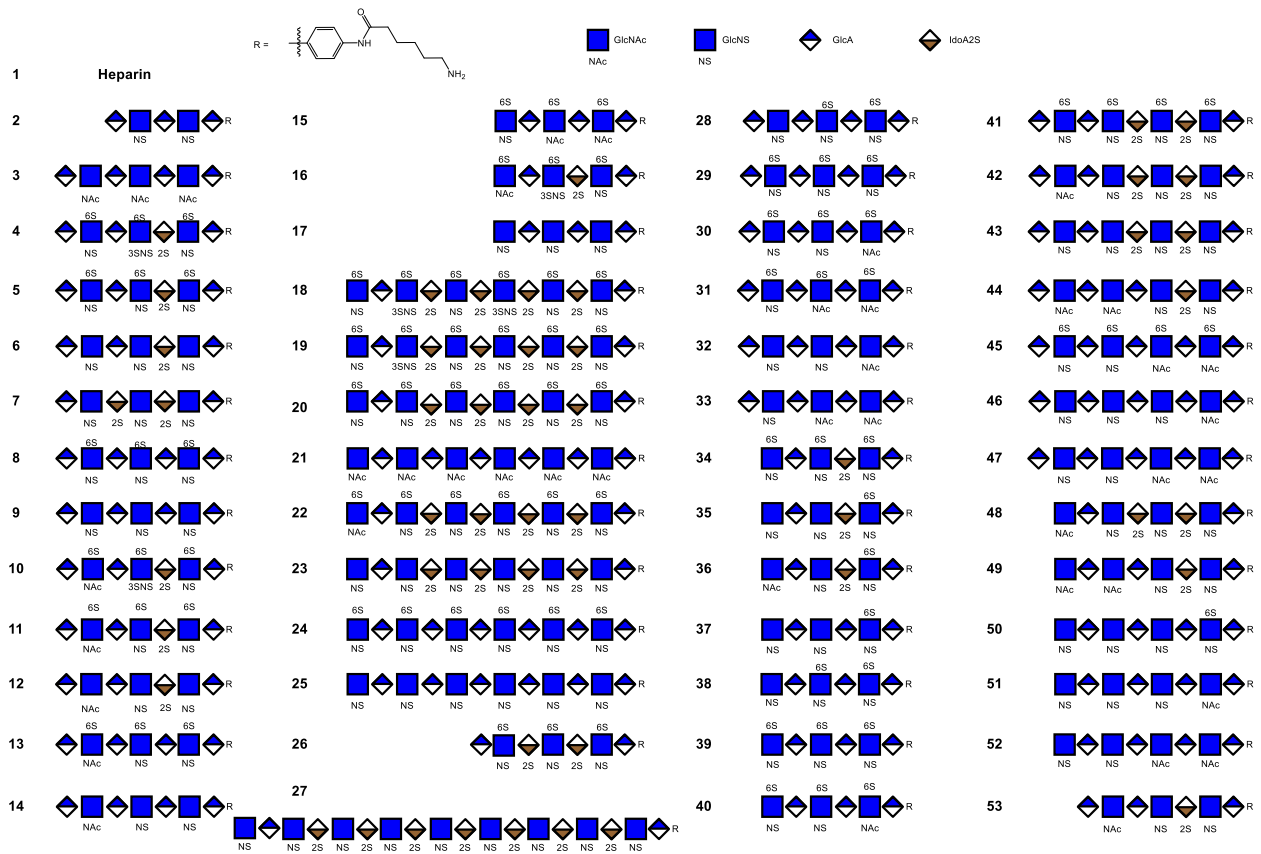

**Supplemental Figure S4. Fifty-three unique heparin constructs were synthesized to provide a range of lengths and sulfation levels.** Abbreviations: GlcNAc: N-acetylglucosamine; GlcNS: N-sulfated glucosamine; GlcA: glucuronic acid; IdoA2S: 2-O-sulfo- $\alpha$ -L-iduronic acid; 6S: 6-O-sulfate.
